# Supplementary material for: A fluoroalkyl iodide additive for Li–O2 battery electrolytes enables stable cycle life and high reversibility
Source: Royal Society of Chemistry journal article supplement (doi:10.1039/d3ta01686b), 2023-01-01
Supplement: d3ta01686b1.pdf [file d3ta01686b1.pdf]

## Supporting information

### Fluoroalkyl Iodide Additive for Li–O<sub>2</sub> Battery Electrolytes Enables Stable Cycle Life and High Reversibility

*Min-Gi Jeong,<sup>a,b</sup> Hyun Ho Lee,<sup>a</sup> Hyeon-Ji Shin,<sup>a,c</sup> Yeseul Jeong,<sup>d</sup> Jang-Yeon Hwang,<sup>e,f</sup> Won-Jin Kwak,<sup>g</sup> Gwangseok Oh,<sup>h</sup> Wonkeun Kim,<sup>h</sup> Kyoungghan Ryu,<sup>h</sup> Seunggho Yu,<sup>a,c</sup> Hee-Dae Lim,<sup>a</sup> Minah Lee,<sup>a</sup> and Hun-Gi Jung<sup>a,c,i,j,\*</sup>*

<sup>a</sup> Energy Storage Research Center, Korea Institute of Science and Technology (KIST), Seoul, 02792, Republic of Korea

<sup>b</sup> Andlinger Center for Energy and the Environment, Princeton University, Princeton, NJ 08540, USA.

<sup>c</sup> Division of Energy and Environmental Engineering, Korea University of Science and Technology, Daejeon 34113, Republic of Korea.

<sup>d</sup> Department of Materials Science and Engineering, Chonnam National University, Gwangju 61186, Republic of Korea.

<sup>e</sup> Department of Energy Engineering, Hanyang University, Seoul 04763, Republic of Korea

<sup>f</sup> Department of Battery Engineering, Hanyang University, Seoul 04763, Republic of Korea

<sup>g</sup> Department of Energy Systems Research, Ajou University, Suwon 16499, Republic of Korea.

<sup>h</sup> Hyundai Motor Company, Uiwang 16082, Republic of Korea.

<sup>i</sup> KIST-SKKU Carbon-Neutral Research Center, Sungkyunkwan University, Suwon 16419, Republic of Korea

<sup>j</sup> Department of Energy Science, Sungkyunkwan University, Suwon, 16419, Republic of Korea

Corresponding

Author's

E-mail:

hungi@kist.re.kr

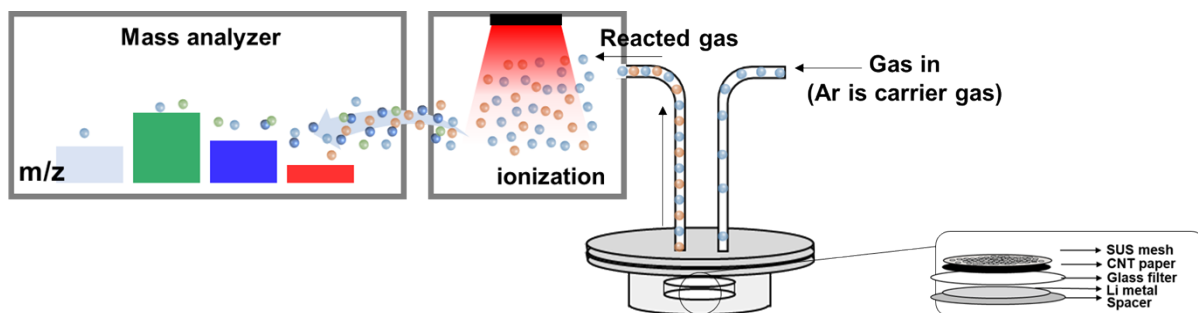

**Fig. S1.** A schematic illustration representing the setup of the DEMS and the structure of a custom designed HS air type cell.

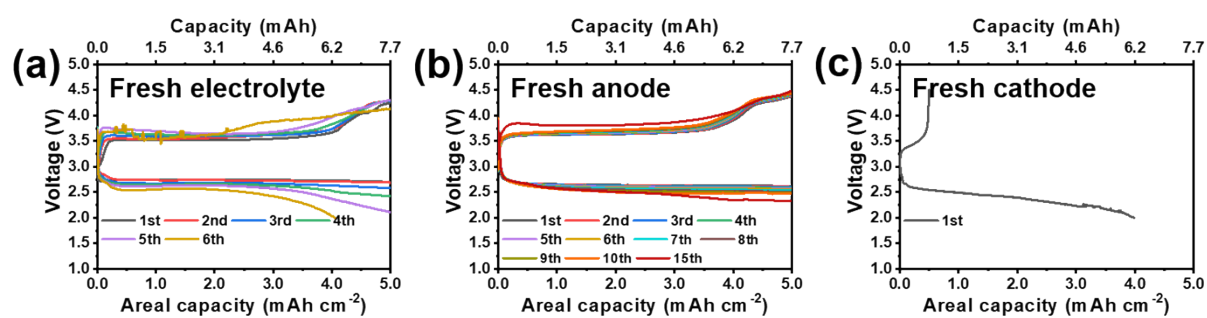

**Fig. S2.** Discharge-charge curves of rebuild Li-O<sub>2</sub> cells using (a) fresh electrolyte, (b) fresh anode, and (c) fresh cathode.

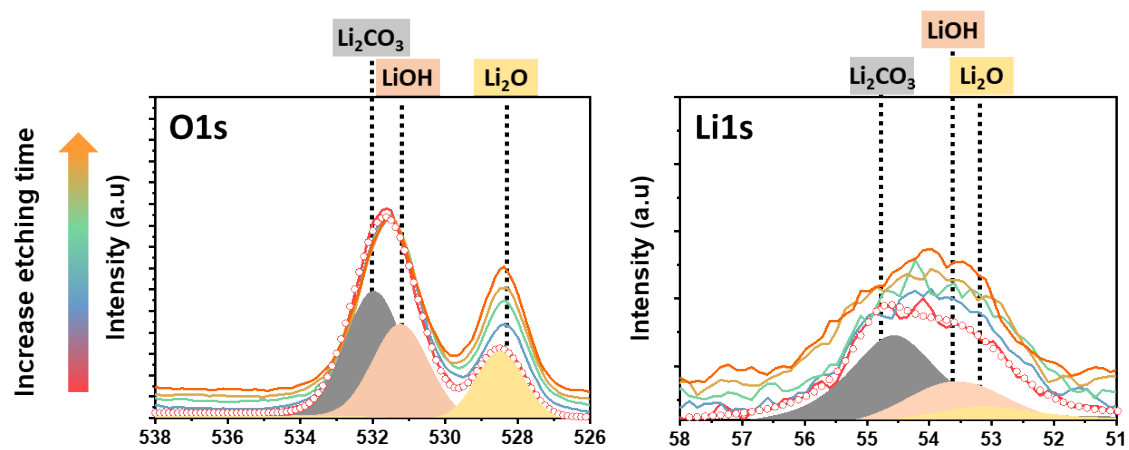

**Fig. S3** XPS depth profiles of Li metal after 25 cycles in an Li-O<sub>2</sub> cell using 1 M LiNO<sub>3</sub>/N,N-dimethylacetamide electrolyte.

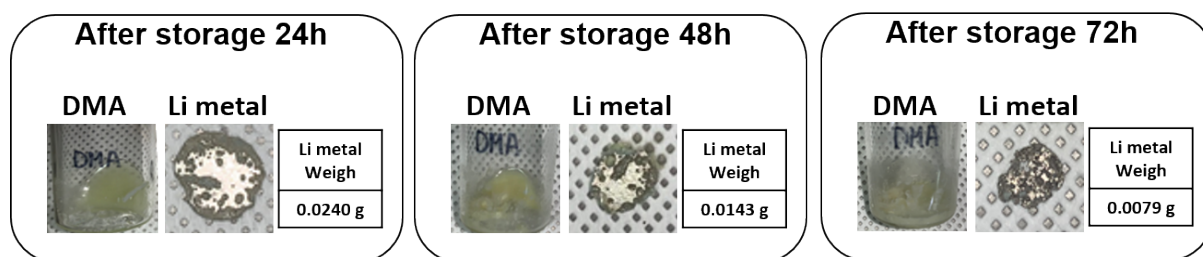

**Fig. S4** Digital photos of N,N-dimethylacetamide (DMA) and Li and the obtained Li metal weight after storage of Li metal in DMA for different time.

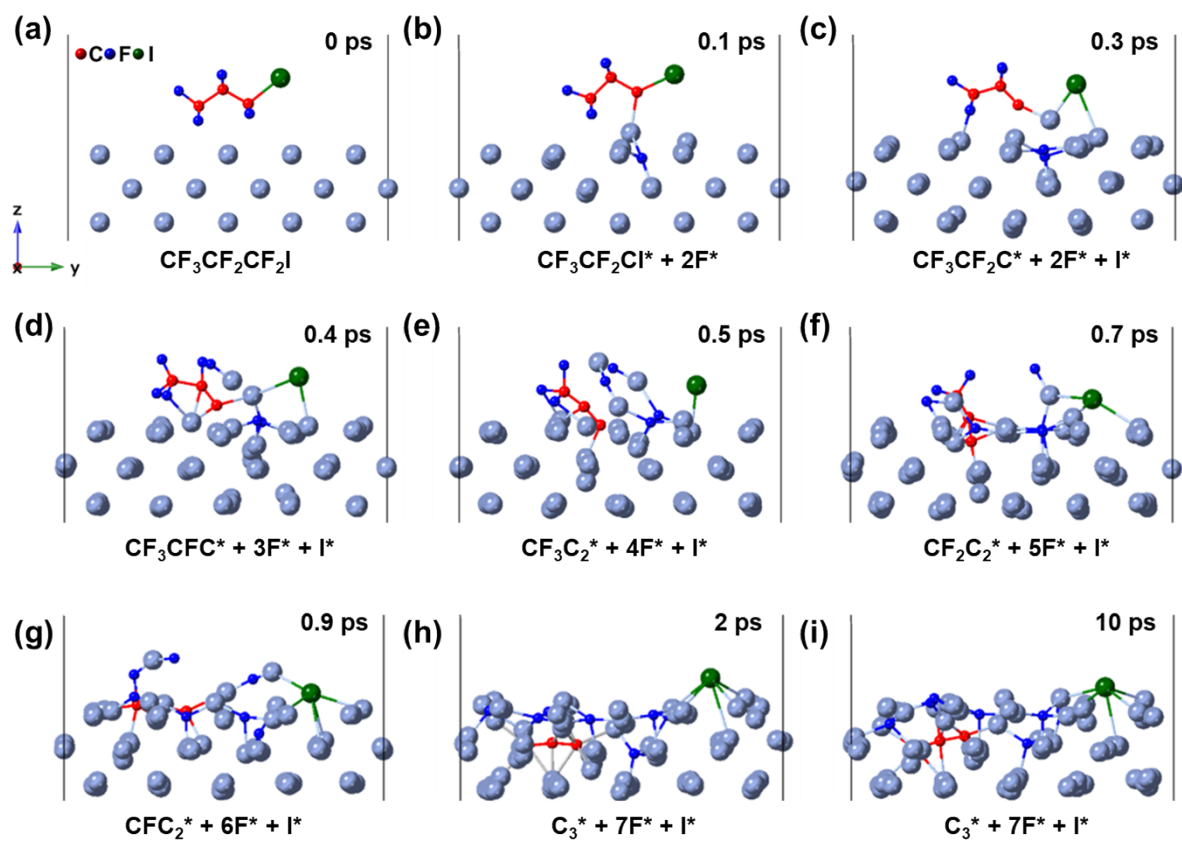

**Fig. S5** *Ab initio* molecular dynamics calculations at 300 K of the dissociation of  $\text{CF}_3(\text{CF}_2)_2\text{I}$  on the  $\text{Li}(100)$  surface.

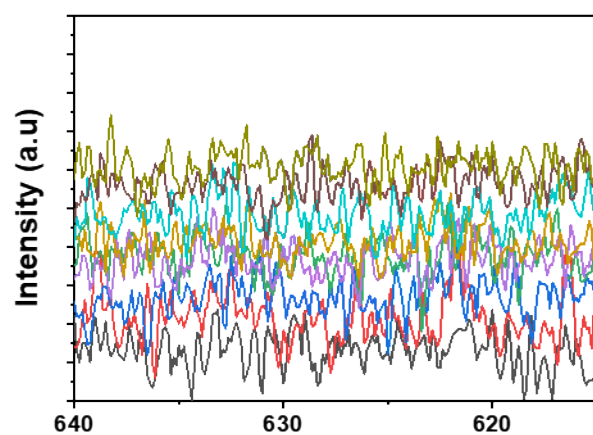

**Fig. S6** XPS depth profiles of I 3d spectra of Li metal after storage in  $\text{CF}_3(\text{CF}_2)_2\text{I}$ -containing electrolyte.

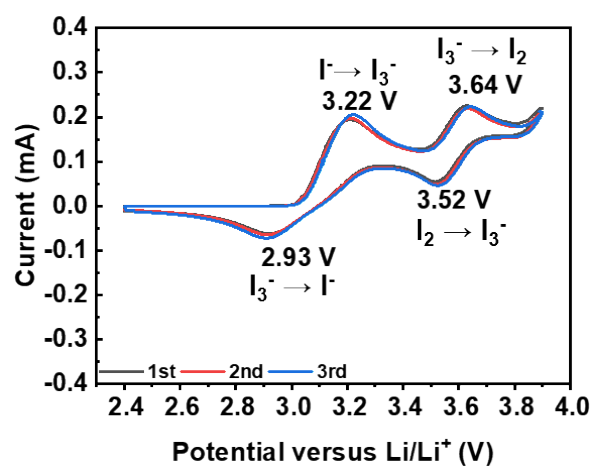

**Fig. S7** Three-electrode CV curves for an electrolyte composed of 0.2 M LiI + 1 M LiNO<sub>3</sub>/N,N-dimethylacetamide.

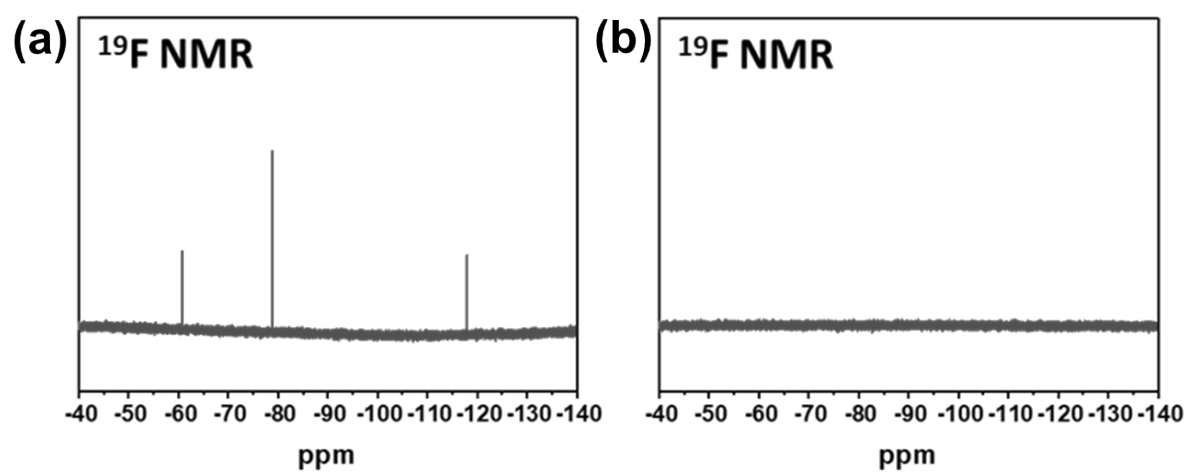

**Fig. S8.** The  $^{19}\text{F}$  NMR spectrum of 0.2 M  $\text{CF}_3(\text{CF}_2)_2\text{I}$  + 1 M  $\text{LiNO}_3/\text{DMA}$  (a) before and (b) after reaction with Li metal.

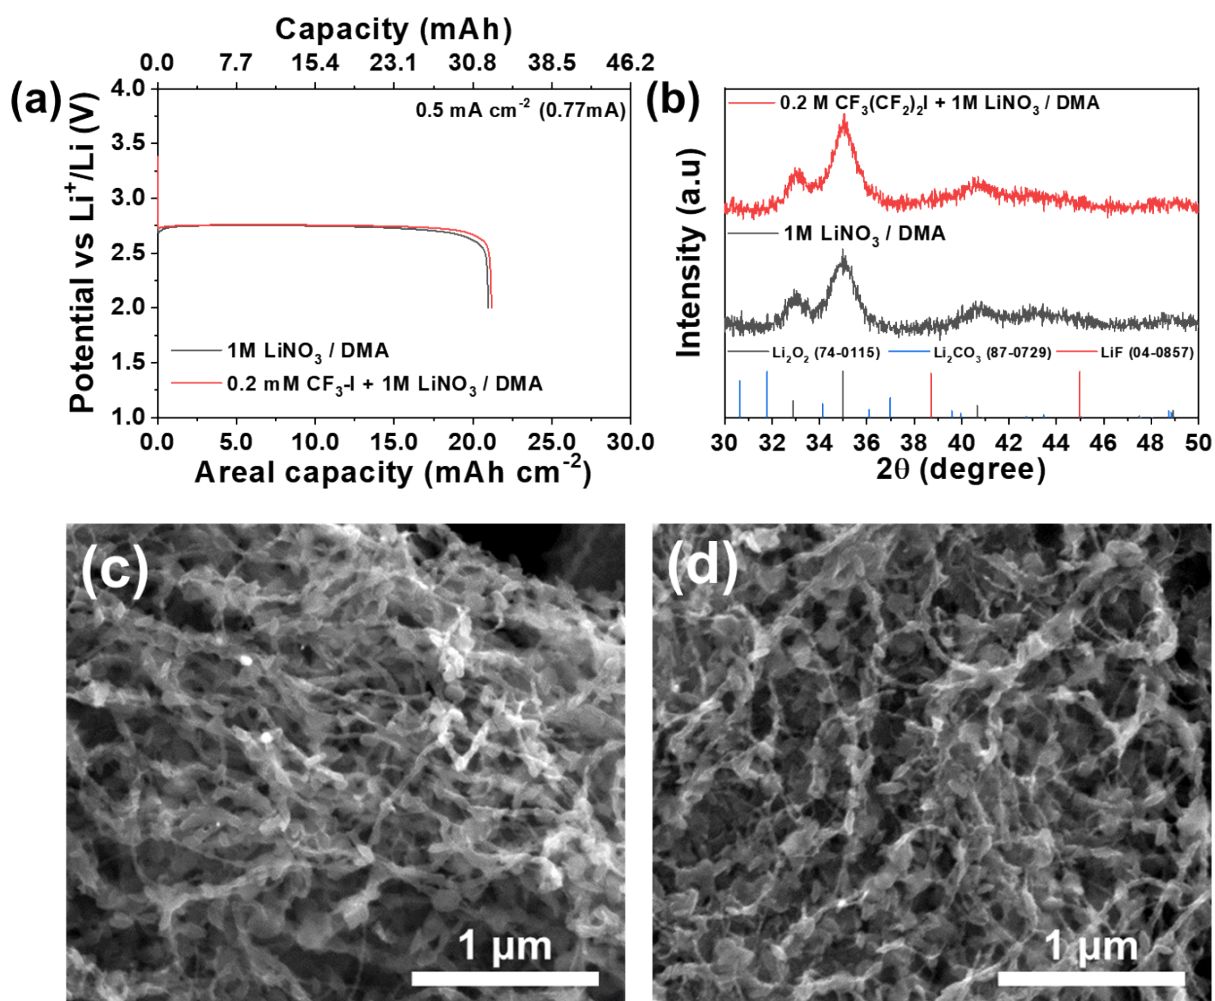

**Fig. S9.** (a) Discharge–charge curves of Li–O<sub>2</sub> cell using 1 M LiNO<sub>3</sub>/N,N-dimethylacetamide (DMA) (black) and 0.2 M CF<sub>3</sub>(CF<sub>2</sub>)<sub>2</sub>I + 1 M LiNO<sub>3</sub> in DMA (red) at a current density of 0.5 mA cm<sup>-2</sup> until 2.0 V. (b) XRD patterns of the discharged cathode in 1 M LiNO<sub>3</sub>/DMA and 0.2 M CF<sub>3</sub>(CF<sub>2</sub>)<sub>2</sub>I + 1 M LiNO<sub>3</sub>/DMA and (c), (d) the respective SEM images.

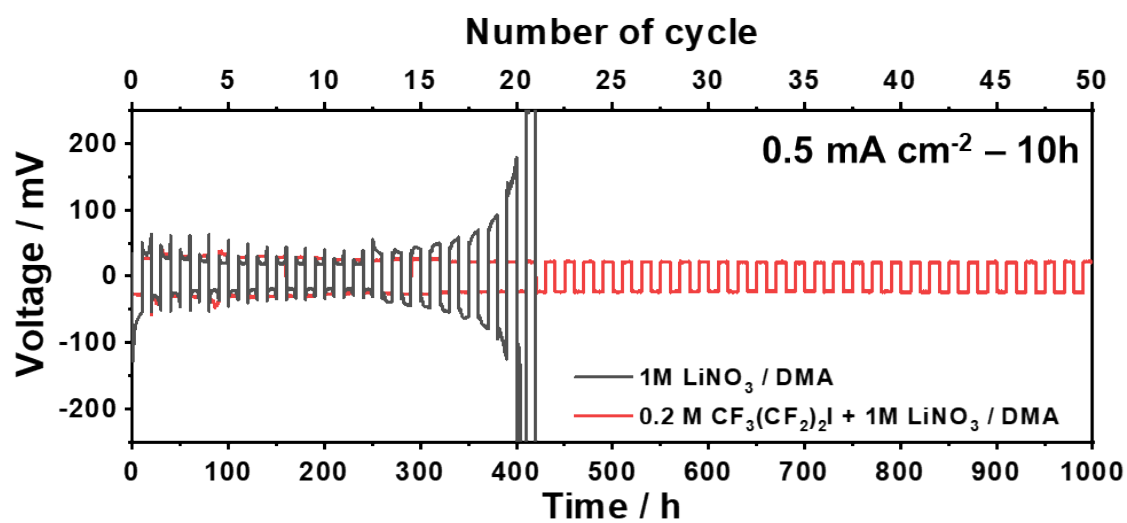

**Fig. S10.** Voltage profiles of a symmetric Li/Li cell cycled in 1 M LiNO<sub>3</sub>/N,N-dimethylacetamide (DMA) (black) and 0.2 M CF<sub>3</sub>(CF<sub>2</sub>)<sub>2</sub>I + 1 M LiNO<sub>3</sub>/DMA (red) at a current density of 0.5 mA cm<sup>-2</sup> under O<sub>2</sub>.

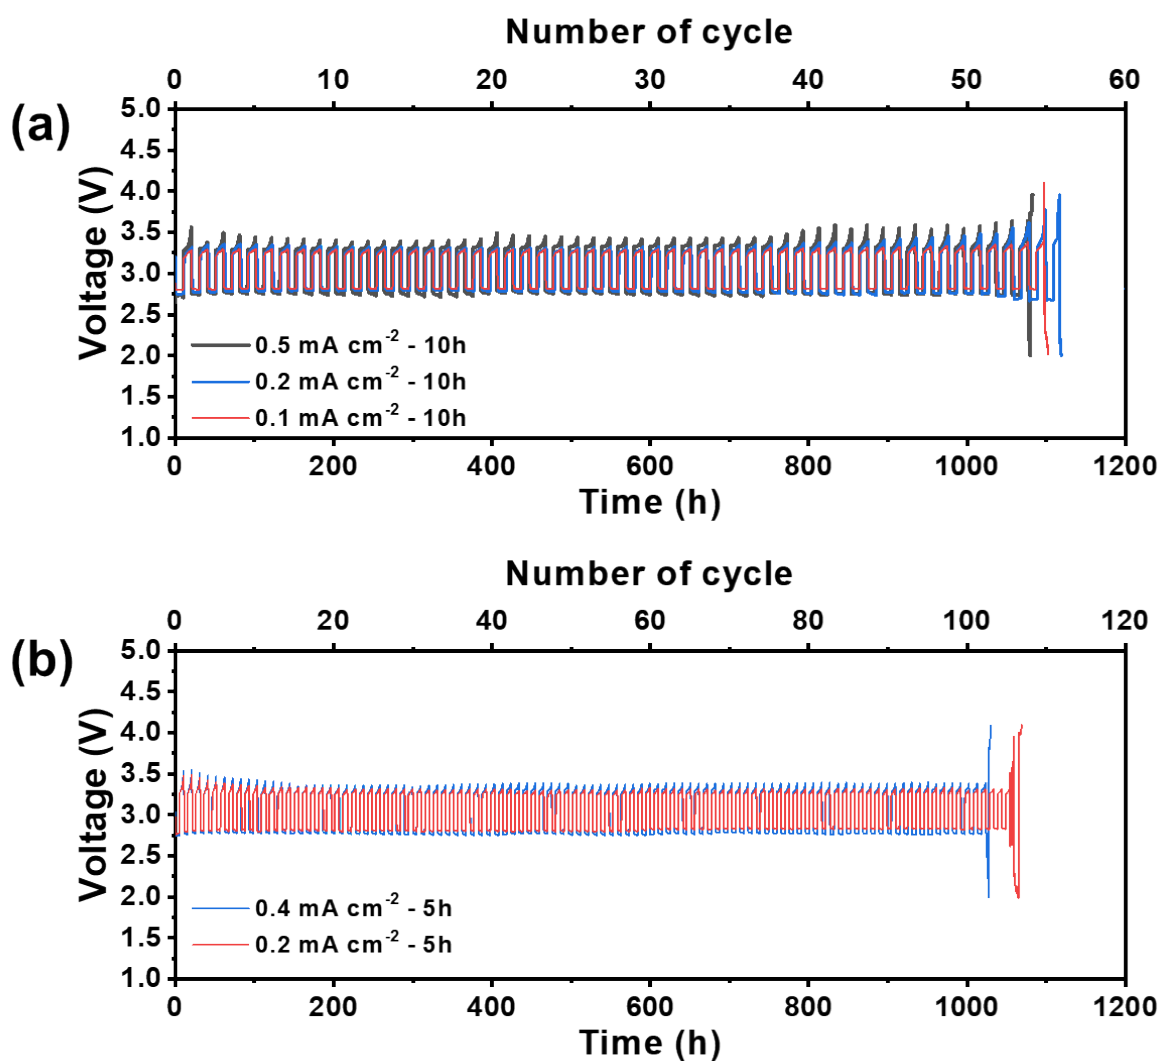

**Fig. S11.** Time–voltage profile of Li–O<sub>2</sub> cell using 0.2 M CF<sub>3</sub>(CF<sub>2</sub>)<sub>2</sub>I + 1 M LiNO<sub>3</sub>/N,N-dimethylacetamide under various current densities with a time limit of (a) 10 h and (b) 5 h.

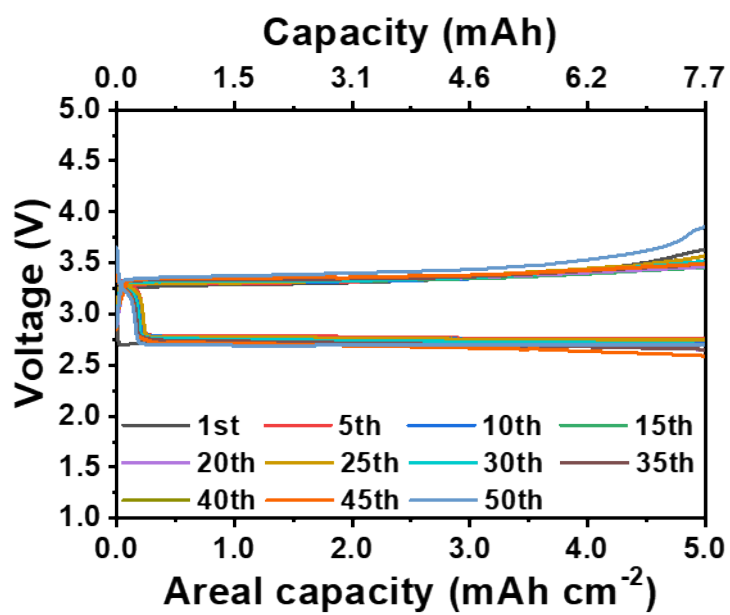

**Fig. S12.** Discharge–charge curves of Li–O<sub>2</sub> cell rebuild using fresh 0.2 M CF<sub>3</sub>(CF<sub>2</sub>)<sub>2</sub>I + 1 M LiNO<sub>3</sub>/N,N-dimethylacetamide electrolyte.

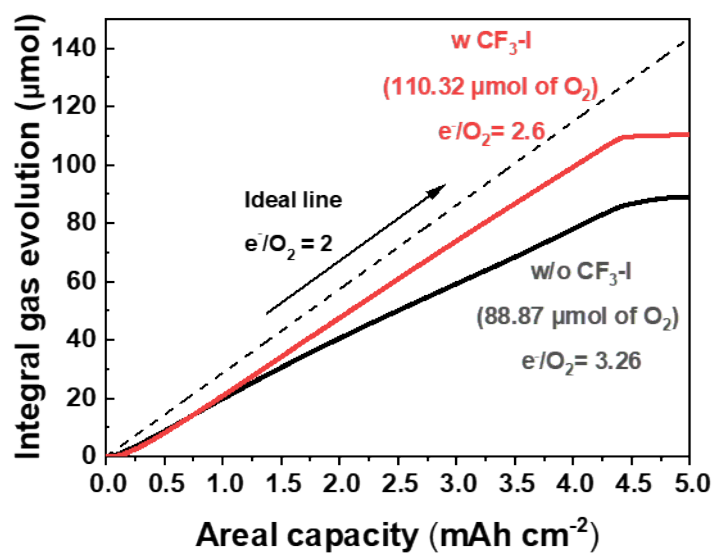

**Fig. S13.** Integral gas evolution for O<sub>2</sub> determined by in situ differential electrochemical mass spectroscopy measurements using 1 M LiNO<sub>3</sub>/N,N-dimethylacetamide (DMA) (black) and 0.2 M CF<sub>3</sub>(CF<sub>2</sub>)<sub>2</sub>I + 1 M LiNO<sub>3</sub>/DMA (red) during the charging process. The dashed line indicates the ideal oxidation of Li<sub>2</sub>O<sub>2</sub> with an e<sup>-</sup>/O<sub>2</sub> value of 2.

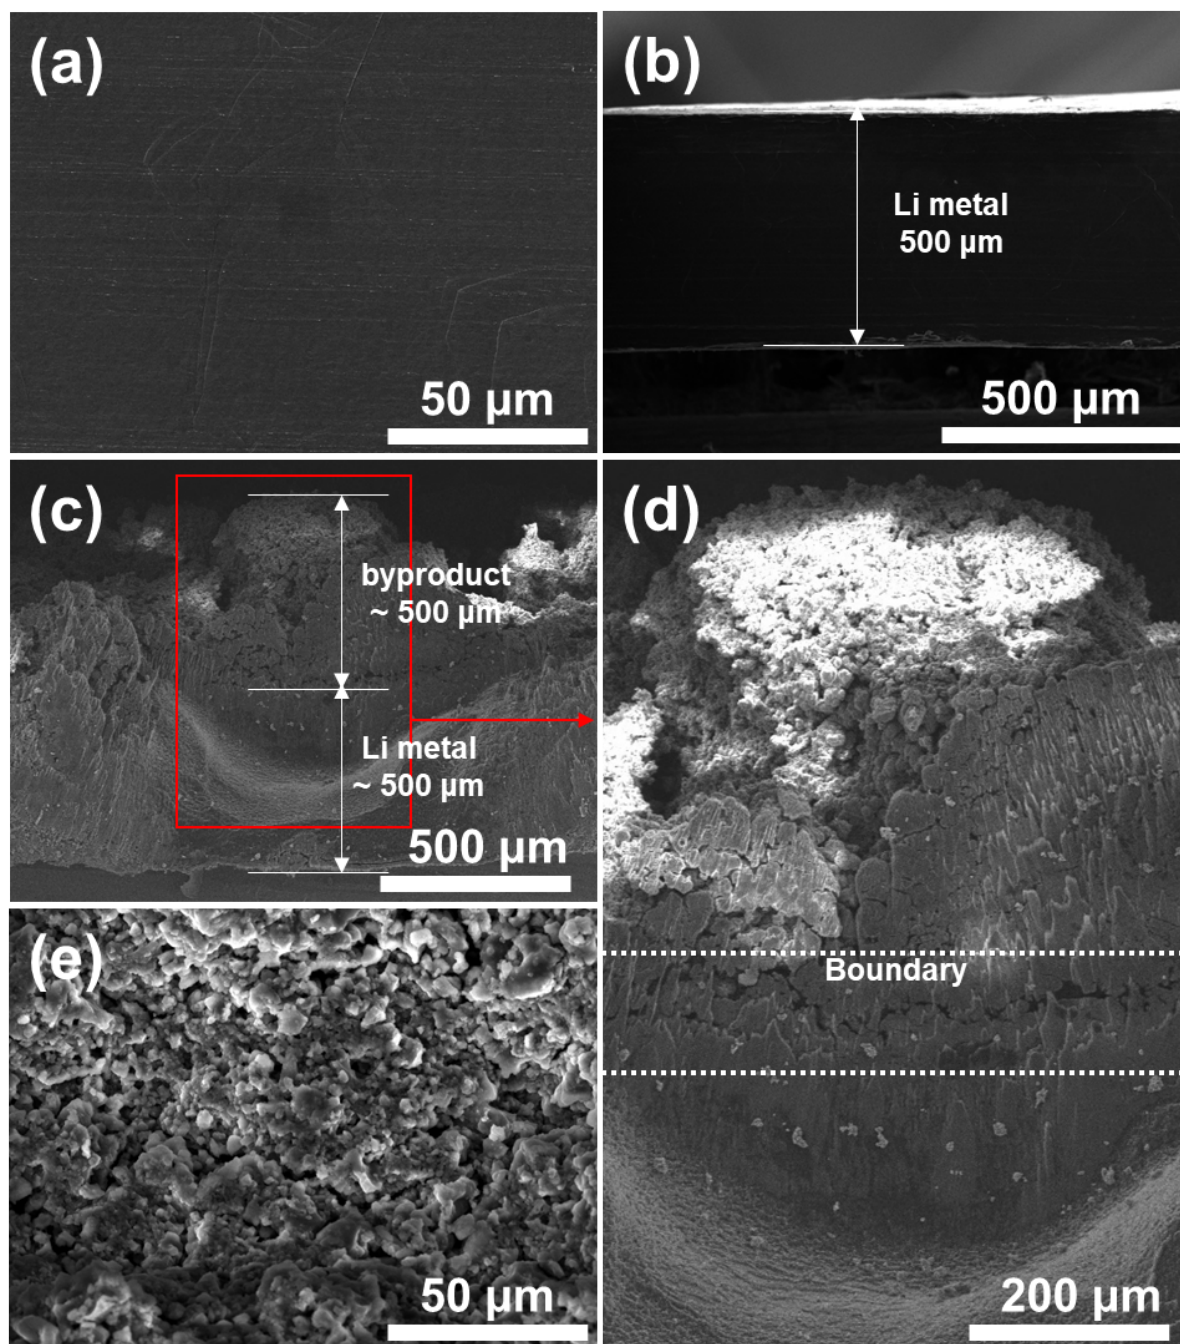

**Fig. S14.** SEM images of (a) surface and (b) a cross-section of pristine Li metal. SEM images of (c) a cross-section and (e) surface of the Li metal after 25 cycles in an Li–O<sub>2</sub> cell using 1 M LiNO<sub>3</sub>/N,N-dimethylacetamide electrolyte. (d) High-magnification SEM image of (c).

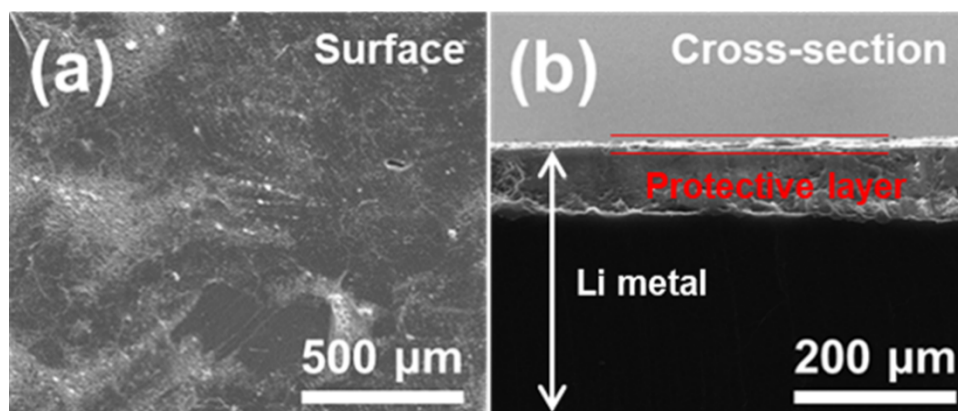

**Fig. S15.** SEM images of (a) surface and (b) a cross-section of Li metal after discharging to a capacity of  $5 \text{ mA h cm}^{-2}$  using  $0.2 \text{ M CF}_3(\text{CF}_2)_2\text{I} + 1 \text{ M LiNO}_3/\text{N,N-dimethylacetamide}$  electrolyte.
